# Supplementary material for: Aromatic amine N-oxide organometallic compounds: searching for prospective agents against infectious diseases
Source: Royal Society of Chemistry journal article supplement (doi:10.1039/c5dt00557d), 2015-01-01
Supplement: c5dt00557d1.pdf [file c5dt00557d1.pdf]

## Supporting information

### **Aromatic amine *N*-oxide organometallic compounds: searching for prospective agents against infectious diseases**

Esteban Rodríguez Arce<sup>a</sup>, M. Florencia Mosquillo<sup>b</sup>, Leticia Pérez-Díaz<sup>b</sup>, Gustavo A. Echeverría<sup>c</sup>, Oscar E. Piro<sup>c</sup>, Alicia Merlino<sup>d</sup>, E. Laura Coitiño<sup>d</sup>, Camila Maríngolo Ribeiro<sup>e</sup>, Clarice Q. F. Leite<sup>e</sup>, Fernando R. Pavan<sup>e</sup>, Lucía Otero<sup>a</sup>, Dinorah Gambino<sup>a</sup>

<sup>a</sup>Cátedra de Química Inorgánica, Departamento Estrella Campos, Facultad de Química, Universidad de la República, Gral. Flores 2124, 11800 Montevideo, Uruguay

<sup>b</sup>Laboratorio de Interacciones Moleculares, Facultad de Ciencias, Universidad de la República, Iguá 4225, 11400 Montevideo, Uruguay

<sup>c</sup>Departamento de Física, Facultad de Ciencias Exactas, Universidad Nacional de La Plata and Institute IFLP (CONICET, CCT-La Plata), C. C. 67, 1900 La Plata, Argentina

<sup>d</sup>Laboratorio de Química Teórica y Computacional, Instituto de Química Biológica, Facultad de Ciencias, Universidad de la República, Iguá 4225, 11400 Montevideo, Uruguay.

<sup>e</sup>Facultade de Ciências Farmacêuticas, Unesp, 14801-902 Araraquara (SP), Brazil

\* To whom correspondence should be addressed. E-mail: [dgambino@fq.edu.uy](mailto:dgambino@fq.edu.uy); Tel. +5982-9249739; fax: +5982-9241906

**Figure S1.** B89/6-31+G(d)/LANL2DZ Kohn-Sham frontier orbitals for the M-dppf-mpo (M=Pd, Pt) species, represented as 0.02 a.u. isosurfaces.

**Pd-dppf-mpo**

**HOMO  $\epsilon = -7.40$  eV**

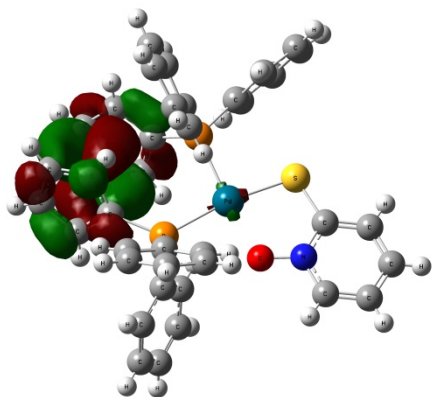

**LUMO  $\epsilon = -5.45$  eV**

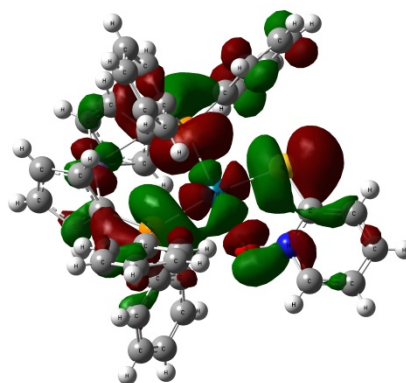

**Pt-dppf-mpo**

**HOMO  $\epsilon = -7.39$  eV**

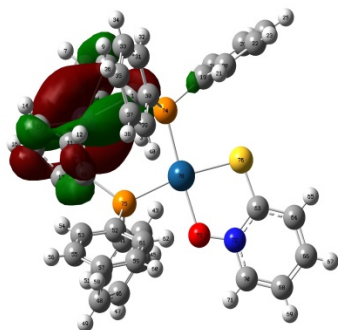

**LUMO  $\epsilon = -4.95$  eV**

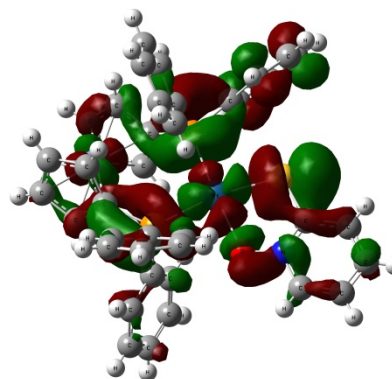

**Table S1.** Wiberg bond indices (WBI, a.u.) as calculated for the species  $[M(\text{mpo})(\text{dppf})]^+$  ( $M=\text{Pd}, \text{Pt}$ ) at the BP86/6-31+G(d)/LANL2DZ level. Atom numbering scheme is shown in the figure.

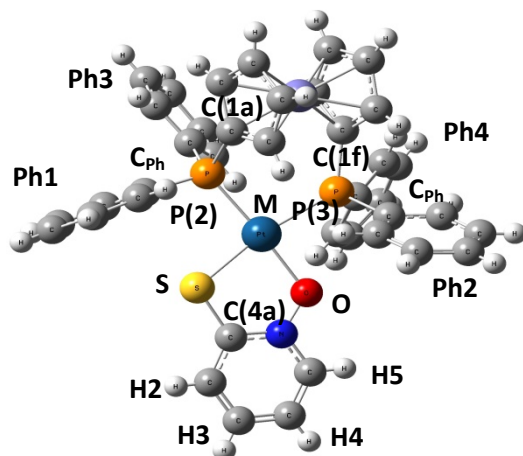

| Bonding interaction                             | $[\text{Pd}(\text{mpo})(\text{dppf})]^+$ | $[\text{Pt}(\text{m})]$ |
|-------------------------------------------------|------------------------------------------|-------------------------|
| M-P(2)                                          | 0.663                                    | 0.7                     |
| M-P(3)                                          | 0.580                                    | 0.6                     |
| M-S                                             | 0.665 [0.710] <sup>a</sup>               | 0.7                     |
| M-O                                             | 0.391 [0.412] <sup>a</sup>               | 0.4                     |
| S-C(4a)                                         | 1.206 [1.220] <sup>a</sup>               | 1.2                     |
| O-N                                             | 1.102 [1.119] <sup>a</sup>               | 1.0                     |
| C(4a)-N                                         | 1.159 [1.148] <sup>a</sup>               | 1.1                     |
| P(2)-C(1a) <sub>Cp</sub>                        | 0.889                                    | 0.8                     |
| P(3)-C(1f) <sub>Cp</sub>                        | 0.889                                    | 0.8                     |
| P(2)-C <sub>Ph1</sub>                           | 0.891                                    | 0.8                     |
| P(2)-C <sub>Ph3</sub>                           | 0.906                                    | 0.9                     |
| P(3)-C <sub>Ph2</sub>                           | 0.908                                    | 0.9                     |
| P(3)-C <sub>Ph4</sub>                           | 0.908                                    | 0.9                     |
| <i>Weak inter-unit interactions<sup>b</sup></i> |                                          |                         |
| P(2)...O                                        | 0.083                                    | 0.1                     |
| P(2)...S                                        | 0.111                                    | 0.0                     |
| P(3)...O                                        | 0.043                                    | 0.0                     |
| P(3)...S                                        | 0.127                                    | 0.1                     |

<sup>a</sup>Values between brackets correspond to the  $[\text{Pd}(\text{mpo})_2]$  complex calculated at the same level of theory. <sup>b</sup>NBO analysis identifies differences in bonding patterns, with 3 units for Pd-dppd-mpo ( $\text{C}_{17}\text{H}_{14}\text{PFEPd}/\text{C}_{17}\text{H}_{14}\text{P}/\text{C}_5\text{H}_4\text{NOS}$ ) and 2 units for Pt-dppf-mpo ( $\text{C}_{34}\text{H}_{28}\text{PFEPt}/\text{C}_5\text{H}_4\text{NOS}$ ) being a neutral mpo moiety the one shared in common in the complexes.

**Table S2a.** NPA atomic charges for the mpo protons and heavy atoms in the mpo moieties of [M(mpo)(dppf)]<sup>+</sup> (M=Pd, Pt), [Pd(mpo)<sub>2</sub>] and in the free ligand. The strength of the principal covalent interactions among them is also reported in terms of WBI. All magnitudes are expressed in a.u.

| Atom(s)                       | Hmpo   | [Pd(mpo) <sub>2</sub> ] | [Pd(mpo)(dppf)] <sup>+</sup> | [Pt(mpo)(dppf)] <sup>+</sup> |
|-------------------------------|--------|-------------------------|------------------------------|------------------------------|
| <i>Natural atomic charges</i> |        |                         |                              |                              |
| H2                            | +0.279 | +0.273                  | +0.229                       | +0.230                       |
| H3                            | +0.265 | +0.263                  | +0.220                       | +0.220                       |
| H4                            | +0.269 | +0.268                  | +0.225                       | +0.225                       |
| H5                            | +0.274 | +0.273                  | +0.219                       | +0.221                       |
| C2                            | -0.262 | -0.017                  | -0.209                       | -0.200                       |
| C3                            | -0.217 | -0.230                  | -0.152                       | -0.152                       |
| C4                            | -0.304 | -0.294                  | -0.221                       | -0.220                       |
| C5                            | +0.004 | -0.005                  | +0.048                       | +0.051                       |
| M                             | ---    | +0.205                  | -0.167                       | -0.223                       |
| O                             | -0.535 | -0.452                  | -0.486                       | -0.487                       |
| S                             | -0.158 | +0.086                  | +0.097                       | +0.108                       |
| N                             | -0.041 | -0.006                  | +0.012                       | +0.008                       |
| C(4a)                         | -0.033 | -0.017                  | -0.009                       | -0.012                       |
| <i>Wibergbond indices</i>     |        |                         |                              |                              |
| C2-H2                         | 0.889  | 0.891                   | 0.912                        | 0.913                        |
| C3-H3                         | 0.900  | 0.902                   | 0.922                        | 0.922                        |
| C4-H4                         | 0.898  | 0.898                   | 0.919                        | 0.918                        |
| C5-H5                         | 0.893  | 0.894                   | 0.923                        | 0.921                        |
| O-N                           | 1.054  | 1.119                   | 1.102                        | 1.090                        |
| S-C(4a)                       | 1.409  | 1.220                   | 1.206                        | 1.208                        |
| N-C(4a)                       | 1.231  | 1.148                   | 1.159                        | 1.166                        |
| O...C(4a)                     | 0.069  | 0.110                   | 0.110                        | 0.108                        |
| S...N                         | 0.147  | 0.099                   | 0.097                        | 0.099                        |
| O...C5                        | 0.068  | 0.102                   | 0.091                        | 0.084                        |
| S...C2                        | 0.090  | 0.062                   | 0.059                        | 0.056                        |

**Table S3a.** NPA atomic charges (a.u.) corresponding to the dppf moiety in  $[M(\text{mpo})(\text{dppf})]^+$  (M=Pd, Pt).

| Atom                   | $[\text{Pd}(\text{mpo})(\text{dppf})]^+$ | $[\text{Pt}(\text{mpo})(\text{dppf})]^+$ |
|------------------------|------------------------------------------|------------------------------------------|
| <b>M</b>               | -0.167                                   | -0.223                                   |
| <b>Fe</b>              | -0.411                                   | -0.429                                   |
| <b>P(2)</b>            | +1.293                                   | +1.308                                   |
| <b>P(3)</b>            | +1.206                                   | +1.236                                   |
| <b>C(1a)</b>           | -0.413                                   | -0.392                                   |
| <b>C(1f)</b>           | -0.387                                   | -0.389                                   |
| <b>C<sub>Ph1</sub></b> | -0.393                                   | -0.389                                   |
| <b>C<sub>Ph2</sub></b> | -0.364                                   | -0.370                                   |
| <b>C<sub>Ph2</sub></b> | -0.396                                   | -0.397                                   |
| <b>C<sub>Ph4</sub></b> | -0.375                                   | -0.382                                   |

**Table S3a.** Atomic coordinates ( $\times 10^4$ ) and equivalent isotropic displacement parameters ( $\text{\AA}^2 \times 10^3$ ) for  $[\text{Pd}(\text{mpo})(\text{dppf})]\text{PF}_6$ .  $U(\text{eq})$  is defined as one third of the trace of the orthogonalized  $U_{ij}$  tensor.

| Atom  | x        | y       | z        | $U(\text{eq})$ |
|-------|----------|---------|----------|----------------|
| C(1A) | 5196(9)  | 7183(4) | 1320(5)  | 41(2)          |
| C(1B) | 4187(9)  | 7496(4) | 1576(5)  | 43(2)          |
| C(1C) | 4540(10) | 8100(4) | 1705(5)  | 56(3)          |
| C(1D) | 5766(10) | 8180(4) | 1532(6)  | 56(3)          |
| C(1E) | 6180(10) | 7639(5) | 1283(5)  | 54(3)          |
| C(1F) | 6109(10) | 6915(4) | 3270(6)  | 49(3)          |
| C(1G) | 7368(9)  | 6991(4) | 3123(6)  | 52(3)          |
| C(1H) | 7797(10) | 7593(5) | 3302(6)  | 65(3)          |
| C(1I) | 6811(10) | 7892(5) | 3554(6)  | 56(3)          |
| C(1J) | 5785(9)  | 7476(4) | 3562(5)  | 45(2)          |
| C(2A) | 4526(9)  | 6329(4) | 68(5)    | 40(2)          |
| C(2B) | 4989(10) | 5876(4) | -335(5)  | 50(3)          |
| C(2C) | 4385(11) | 5775(5) | -1164(6) | 67(3)          |
| C(2D) | 3332(12) | 6137(5) | -1559(6) | 62(3)          |
| C(2E) | 2904(11) | 6590(5) | -1176(6) | 63(3)          |
| C(2F) | 3470(9)  | 6690(4) | -356(6)  | 48(3)          |
| C(2G) | 6937(9)  | 6168(5) | 1346(6)  | 52(3)          |
| C(2H) | 7836(10) | 6423(5) | 989(7)   | 59(3)          |
| C(2I) | 9158(12) | 6272(6) | 1205(9)  | 86(4)          |
| C(2J) | 9610(14) | 5841(7) | 1785(11) | 112(6)         |
| C(2K) | 8763(14) | 5540(6) | 2128(9)  | 98(5)          |
| C(2L) | 7405(11) | 5707(5) | 1902(7)  | 72(3)          |
| C(3A) | 3688(9)  | 6457(4) | 3504(5)  | 42(2)          |
| C(3B) | 2492(9)  | 6648(4) | 2989(5)  | 48(3)          |
| C(3C) | 1435(11) | 6838(5) | 3282(6)  | 62(3)          |
| C(3D) | 1567(12) | 6832(5) | 4078(6)  | 64(3)          |
| C(3E) | 2743(13) | 6655(5) | 4596(6)  | 73(4)          |
| C(3F) | 3820(12) | 6476(5) | 4329(6)  | 63(3)          |
| C(3G) | 6112(10) | 5708(5) | 3767(6)  | 60(3)          |
| C(3H) | 7212(11) | 5865(5) | 4379(7)  | 93(5)          |
| C(3I) | 7987(15) | 5433(7) | 4863(9)  | 136(7)         |
| C(3J) | 7723(18) | 4860(6) | 4742(10) | 170(9)         |
| C(3K) | 6640(20) | 4686(7) | 4108(12) | 241(14)        |
| C(3L) | 5832(17) | 5114(6) | 3645(9)  | 169(9)         |
| C(4A) | 1981(9)  | 4903(4) | 1084(5)  | 43(2)          |
| C(4B) | 1070(10) | 4484(5) | 659(6)   | 55(3)          |
| C(4C) | 405(10)  | 4099(5) | 1017(7)  | 60(3)          |
| C(4D) | 684(10)  | 4096(4) | 1843(7)  | 63(3)          |
| C(4E) | 1581(9)  | 4502(4) | 2265(6)  | 50(3)          |
| N(4)  | 2223(7)  | 4895(3) | 1899(4)  | 44(2)          |
| O(4)  | 3017(6)  | 5297(3) | 2377(3)  | 53(2)          |
| P(2)  | 5207(2)  | 6405(1) | 1150(2)  | 40(1)          |
| P(3)  | 5078(3)  | 6256(1) | 3098(1)  | 45(1)          |
| S(4)  | 2800(3)  | 5418(1) | 661(1)   | 50(1)          |
| Fe    | 5975(1)  | 7553(1) | 2421(1)  | 44(1)          |
| Pd    | 4060(1)  | 5861(1) | 1824(1)  | 41(1)          |
| F(41) | 966(9)   | 7391(4) | 6023(6)  | 154(4)         |
| F(42) | -1103(8) | 7120(4) | 5518(5)  | 149(3)         |
| F(43) | -853(11) | 6383(4) | 6359(5)  | 153(4)         |
| F(44) | 1254(10) | 6693(6) | 6880(6)  | 213(6)         |
| F(45) | 485(11)  | 6488(4) | 5585(6)  | 160(4)         |
| F(46) | -381(9)  | 7281(4) | 6815(5)  | 154(4)         |
| P(4)  | 75(3)    | 6885(2) | 6209(2)  | 69(1)          |

**Table S3b.** Atomic coordinates ( $\times 10^4$ ) and equivalent isotropic displacement parameters ( $\text{\AA}^2 \times 10^3$ ) for  $[\text{Pt}(\text{mpo})(\text{dppf})]\text{PF}_6$ .  $U(\text{eq})$  is defined as one third of the trace of the orthogonalized  $U_{ij}$  tensor.

| Atom  | x        | y       | z        | $U(\text{eq})$ |
|-------|----------|---------|----------|----------------|
| C(1A) | 5191(6)  | 7202(3) | 1309(3)  | 39(2)          |
| C(1B) | 4168(6)  | 7498(3) | 1559(3)  | 46(2)          |
| C(1C) | 4519(7)  | 8110(3) | 1696(4)  | 57(2)          |
| C(1D) | 5757(8)  | 8193(3) | 1534(4)  | 58(2)          |
| C(1E) | 6175(7)  | 7641(3) | 1283(4)  | 55(2)          |
| C(1F) | 6073(7)  | 6916(3) | 3241(3)  | 44(2)          |
| C(1G) | 7358(7)  | 7004(3) | 3090(4)  | 55(2)          |
| C(1H) | 7758(7)  | 7604(3) | 3276(4)  | 59(2)          |
| C(1I) | 6758(8)  | 7891(3) | 3556(4)  | 58(2)          |
| C(1J) | 5708(7)  | 7474(3) | 3526(4)  | 53(2)          |
| C(2A) | 4538(6)  | 6325(3) | 57(4)    | 41(2)          |
| C(2B) | 4964(7)  | 5856(3) | -338(4)  | 51(2)          |
| C(2C) | 4354(8)  | 5768(3) | -1141(4) | 66(2)          |
| C(2D) | 3325(8)  | 6122(4) | -1562(4) | 64(2)          |
| C(2E) | 2890(7)  | 6593(3) | -1166(4) | 60(2)          |
| C(2F) | 3487(7)  | 6687(3) | -368(4)  | 49(2)          |
| C(2G) | 6947(6)  | 6185(3) | 1334(4)  | 49(2)          |
| C(2H) | 7795(7)  | 6452(3) | 956(5)   | 70(2)          |
| C(2I) | 9148(9)  | 6300(4) | 1156(7)  | 93(4)          |
| C(2J) | 9620(10) | 5873(5) | 1727(8)  | 118(5)         |
| C(2K) | 8785(10) | 5579(4) | 2087(6)  | 99(3)          |
| C(2L) | 7443(8)  | 5735(3) | 1893(5)  | 64(2)          |
| C(3A) | 3684(7)  | 6451(3) | 3487(4)  | 48(2)          |
| C(3B) | 2484(7)  | 6658(3) | 2995(4)  | 54(2)          |
| C(3C) | 1449(8)  | 6827(3) | 3294(4)  | 60(2)          |
| C(3D) | 1579(10) | 6811(4) | 4095(5)  | 75(2)          |
| C(3E) | 2750(10) | 6621(4) | 4590(5)  | 80(3)          |
| C(3F) | 3825(9)  | 6438(4) | 4314(4)  | 73(2)          |
| C(3G) | 6110(8)  | 5708(3) | 3729(5)  | 70(2)          |
| C(3H) | 7154(10) | 5874(4) | 4358(5)  | 101(3)         |
| C(3I) | 8002(11) | 5448(5) | 4841(7)  | 144(5)         |
| C(3J) | 7789(14) | 4873(5) | 4686(7)  | 184(7)         |
| C(3K) | 6800(15) | 4691(4) | 4028(8)  | 205(8)         |
| C(3L) | 5958(11) | 5109(4) | 3558(6)  | 135(5)         |
| C(4A) | 1986(6)  | 4905(3) | 1088(4)  | 41(2)          |
| C(4B) | 1055(7)  | 4490(3) | 658(4)   | 55(2)          |
| C(4C) | 426(8)   | 4102(3) | 1030(5)  | 66(2)          |
| C(4D) | 701(8)   | 4111(3) | 1851(5)  | 64(2)          |
| C(4E) | 1586(7)  | 4515(3) | 2272(4)  | 53(2)          |
| N(4)  | 2209(5)  | 4906(2) | 1898(3)  | 41(1)          |
| O(4)  | 3026(4)  | 5306(2) | 2369(2)  | 51(1)          |
| P(2)  | 5209(2)  | 6411(1) | 1136(1)  | 39(1)          |
| P(3)  | 5049(2)  | 6253(1) | 3068(1)  | 46(1)          |
| S(4)  | 2792(2)  | 5417(1) | 651(1)   | 46(1)          |
| Fe    | 5945(1)  | 7558(1) | 2406(1)  | 45(1)          |
| Pt    | 4066(1)  | 5867(1) | 1804(1)  | 39(1)          |
| F(41) | 944(6)   | 7393(3) | 6031(4)  | 143(2)         |
| F(42) | -1113(6) | 7117(3) | 5541(3)  | 145(2)         |
| F(43) | -840(8)  | 6364(3) | 6377(3)  | 157(3)         |
| F(44) | 1255(8)  | 6670(4) | 6905(4)  | 203(4)         |
| F(45) | 485(7)   | 6480(2) | 5600(4)  | 153(3)         |
| F(46) | -410(6)  | 7264(3) | 6826(3)  | 147(3)         |
| P(4)  | 79(2)    | 6868(1) | 6223(1)  | 67(1)          |

**Table S4a.** Full bond lengths [Å] and angles [°] for [Pd(mpo)(dppf)]PF<sub>6</sub>.

|             |           |                   |           |
|-------------|-----------|-------------------|-----------|
| C(1A)-C(1B) | 1.426(11) | F(44)-P(4)        | 1.493(8)  |
| C(1A)-C(1E) | 1.454(12) | F(45)-P(4)        | 1.545(8)  |
| C(1A)-P(2)  | 1.763(10) | F(46)-P(4)        | 1.543(8)  |
| C(1A)-Fe    | 2.026(8)  |                   |           |
| C(1B)-C(1C) | 1.398(11) | C(1B)-C(1A)-C(1E) | 104.7(8)  |
| C(1B)-Fe    | 2.016(9)  | C(1B)-C(1A)-P(2)  | 125.1(7)  |
| C(1C)-C(1D) | 1.394(12) | C(1E)-C(1A)-P(2)  | 130.2(7)  |
| C(1C)-Fe    | 2.050(9)  | C(1B)-C(1A)-Fe    | 69.0(5)   |
| C(1D)-C(1E) | 1.389(12) | C(1E)-C(1A)-Fe    | 69.9(5)   |
| C(1D)-Fe    | 2.046(10) | P(2)-C(1A)-Fe     | 122.7(5)  |
| C(1E)-Fe    | 2.048(10) | C(1C)-C(1B)-C(1A) | 109.9(9)  |
| C(1F)-C(1G) | 1.405(12) | C(1C)-C(1B)-Fe    | 71.2(5)   |
| C(1F)-C(1J) | 1.424(12) | C(1A)-C(1B)-Fe    | 69.7(5)   |
| C(1F)-P(3)  | 1.793(10) | C(1B)-C(1C)-C(1D) | 107.6(9)  |
| C(1F)-Fe    | 2.023(9)  | C(1B)-C(1C)-Fe    | 68.6(5)   |
| C(1G)-C(1H) | 1.421(12) | C(1D)-C(1C)-Fe    | 70.0(6)   |
| C(1G)-Fe    | 2.037(9)  | C(1E)-C(1D)-C(1C) | 109.5(9)  |
| C(1H)-C(1I) | 1.387(13) | C(1E)-C(1D)-Fe    | 70.3(6)   |
| C(1H)-Fe    | 2.068(9)  | C(1C)-C(1D)-Fe    | 70.2(6)   |
| C(1I)-C(1J) | 1.413(12) | C(1D)-C(1E)-C(1A) | 108.3(9)  |
| C(1I)-Fe    | 2.053(9)  | C(1D)-C(1E)-Fe    | 70.1(6)   |
| C(1J)-Fe    | 2.046(9)  | C(1A)-C(1E)-Fe    | 68.3(5)   |
| C(2A)-C(2B) | 1.387(11) | C(1G)-C(1F)-C(1J) | 106.3(8)  |
| C(2A)-C(2F) | 1.390(11) | C(1G)-C(1F)-P(3)  | 127.4(8)  |
| C(2A)-P(2)  | 1.814(9)  | C(1J)-C(1F)-P(3)  | 126.3(8)  |
| C(2B)-C(2C) | 1.413(12) | C(1G)-C(1F)-Fe    | 70.3(6)   |
| C(2C)-C(2D) | 1.375(13) | C(1J)-C(1F)-Fe    | 70.4(5)   |
| C(2D)-C(2E) | 1.349(13) | P(3)-C(1F)-Fe     | 122.7(5)  |
| C(2E)-C(2F) | 1.394(12) | C(1F)-C(1G)-C(1H) | 108.9(9)  |
| C(2G)-C(2H) | 1.375(13) | C(1F)-C(1G)-Fe    | 69.2(5)   |
| C(2G)-C(2L) | 1.401(13) | C(1H)-C(1G)-Fe    | 70.9(5)   |
| C(2G)-P(2)  | 1.805(10) | C(1I)-C(1H)-C(1G) | 108.1(10) |
| C(2H)-C(2I) | 1.355(14) | C(1I)-C(1H)-Fe    | 69.7(5)   |
| C(2I)-C(2J) | 1.374(18) | C(1G)-C(1H)-Fe    | 68.6(5)   |
| C(2J)-C(2K) | 1.365(18) | C(1H)-C(1I)-C(1J) | 107.9(9)  |
| C(2K)-C(2L) | 1.399(14) | C(1H)-C(1I)-Fe    | 70.9(6)   |
| C(3A)-C(3B) | 1.374(11) | C(1J)-C(1I)-Fe    | 69.6(5)   |
| C(3A)-C(3F) | 1.398(11) | C(1I)-C(1J)-C(1F) | 108.8(9)  |
| C(3A)-P(3)  | 1.824(9)  | C(1I)-C(1J)-Fe    | 70.1(6)   |
| C(3B)-C(3C) | 1.393(12) | C(1F)-C(1J)-Fe    | 68.7(5)   |
| C(3C)-C(3D) | 1.347(12) | C(2B)-C(2A)-C(2F) | 119.2(8)  |
| C(3D)-C(3E) | 1.352(13) | C(2B)-C(2A)-P(2)  | 119.8(7)  |
| C(3E)-C(3F) | 1.378(13) | C(2F)-C(2A)-P(2)  | 120.8(7)  |
| C(3G)-C(3L) | 1.361(13) | C(2A)-C(2B)-C(2C) | 120.7(9)  |
| C(3G)-C(3H) | 1.366(12) | C(2D)-C(2C)-C(2B) | 118.4(10) |
| C(3G)-P(3)  | 1.813(10) | C(2E)-C(2D)-C(2C) | 121.3(10) |
| C(3H)-C(3I) | 1.377(14) | C(2D)-C(2E)-C(2F) | 121.2(10) |
| C(3I)-C(3J) | 1.313(16) | C(2A)-C(2F)-C(2E) | 119.2(10) |
| C(3J)-C(3K) | 1.388(17) | C(2H)-C(2G)-C(2L) | 117.7(10) |
| C(3K)-C(3L) | 1.371(17) | C(2H)-C(2G)-P(2)  | 123.7(9)  |
| C(4A)-N(4)  | 1.362(10) | C(2L)-C(2G)-P(2)  | 118.6(8)  |
| C(4A)-C(4B) | 1.385(11) | C(2I)-C(2H)-C(2G) | 122.1(12) |
| C(4A)-S(4)  | 1.710(9)  | C(2H)-C(2I)-C(2J) | 119.1(14) |
| C(4B)-C(4C) | 1.354(12) | C(2K)-C(2J)-C(2I) | 122.2(14) |
| C(4C)-C(4D) | 1.377(13) | C(2J)-C(2K)-C(2L) | 117.7(14) |
| C(4D)-C(4E) | 1.355(12) | C(2G)-C(2L)-C(2K) | 121.0(12) |
| C(4E)-N(4)  | 1.359(11) | C(3B)-C(3A)-C(3F) | 117.8(9)  |
| N(4)-O(4)   | 1.335(8)  | C(3B)-C(3A)-P(3)  | 119.4(6)  |
| O(4)-Pd     | 2.059(6)  | C(3F)-C(3A)-P(3)  | 122.6(8)  |
| P(2)-Pd     | 2.240(3)  | C(3A)-C(3B)-C(3C) | 121.0(9)  |
| P(3)-Pd     | 2.335(2)  | C(3D)-C(3C)-C(3B) | 120.2(10) |
| S(4)-Pd     | 2.293(2)  | C(3C)-C(3D)-C(3E) | 119.7(11) |
| F(41)-P(4)  | 1.547(8)  | C(3D)-C(3E)-C(3F) | 121.6(9)  |
| F(42)-P(4)  | 1.542(8)  | C(3E)-C(3F)-C(3A) | 119.6(10) |
| F(43)-P(4)  | 1.544(8)  | C(3L)-C(3G)-C(3H) | 117.7(10) |



|                   |           |                  |            |
|-------------------|-----------|------------------|------------|
| C(3L)-C(3G)-P(3)  | 119.7(8)  | C(1G)-Fe-C(1E)   | 112.7(4)   |
| C(3H)-C(3G)-P(3)  | 122.6(9)  | C(1D)-Fe-C(1E)   | 39.6(3)    |
| C(3G)-C(3H)-C(3I) | 120.7(12) | C(1C)-Fe-C(1E)   | 67.3(4)    |
| C(3J)-C(3I)-C(3H) | 121.6(13) | C(1F)-Fe-C(1J)   | 41.0(3)    |
| C(3I)-C(3J)-C(3K) | 119.1(13) | C(1A)-Fe-C(1J)   | 138.8(4)   |
| C(3L)-C(3K)-C(3J) | 119.5(14) | C(1B)-Fe-C(1J)   | 112.3(4)   |
| C(3G)-C(3L)-C(3K) | 121.4(12) | C(1G)-Fe-C(1J)   | 67.3(4)    |
| N(4)-C(4A)-C(4B)  | 116.2(9)  | C(1D)-Fe-C(1J)   | 140.0(4)   |
| N(4)-C(4A)-S(4)   | 118.9(7)  | C(1C)-Fe-C(1J)   | 112.7(4)   |
| C(4B)-C(4A)-S(4)  | 124.9(7)  | C(1E)-Fe-C(1J)   | 179.3(4)   |
| C(4C)-C(4B)-C(4A) | 122.9(9)  | C(1F)-Fe-C(1I)   | 68.9(4)    |
| C(4B)-C(4C)-C(4D) | 119.5(9)  | C(1A)-Fe-C(1I)   | 177.3(4)   |
| C(4E)-C(4D)-C(4C) | 118.0(10) | C(1B)-Fe-C(1I)   | 140.6(4)   |
| N(4)-C(4E)-C(4D)  | 122.1(9)  | C(1G)-Fe-C(1I)   | 67.6(4)    |
| O(4)-N(4)-C(4E)   | 116.2(7)  | C(1D)-Fe-C(1I)   | 113.2(4)   |
| O(4)-N(4)-C(4A)   | 122.4(8)  | C(1C)-Fe-C(1I)   | 113.5(4)   |
| C(4E)-N(4)-C(4A)  | 121.2(8)  | C(1E)-Fe-C(1I)   | 139.0(4)   |
| N(4)-O(4)-Pd      | 115.7(5)  | C(1J)-Fe-C(1I)   | 40.3(3)    |
| C(1A)-P(2)-C(2A)  | 104.2(4)  | C(1F)-Fe-C(1H)   | 68.3(4)    |
| C(1A)-P(2)-C(2G)  | 108.0(5)  | C(1A)-Fe-C(1H)   | 138.7(4)   |
| C(2A)-P(2)-C(2G)  | 104.2(4)  | C(1B)-Fe-C(1H)   | 178.5(4)   |
| C(1A)-P(2)-Pd     | 114.7(3)  | C(1G)-Fe-C(1H)   | 40.5(3)    |
| C(2A)-P(2)-Pd     | 112.2(3)  | C(1D)-Fe-C(1H)   | 114.1(4)   |
| C(2G)-P(2)-Pd     | 112.6(4)  | C(1C)-Fe-C(1H)   | 141.0(4)   |
| C(1F)-P(3)-C(3G)  | 103.3(4)  | C(1E)-Fe-C(1H)   | 112.8(5)   |
| C(1F)-P(3)-C(3A)  | 103.3(5)  | C(1J)-Fe-C(1H)   | 66.8(4)    |
| C(3G)-P(3)-C(3A)  | 107.9(5)  | C(1I)-Fe-C(1H)   | 39.3(4)    |
| C(1F)-P(3)-Pd     | 123.9(3)  | O(4)-Pd-P(2)     | 174.86(19) |
| C(3G)-P(3)-Pd     | 112.2(4)  | O(4)-Pd-S(4)     | 84.38(17)  |
| C(3A)-P(3)-Pd     | 105.1(3)  | P(2)-Pd-S(4)     | 91.73(9)   |
| C(4A)-S(4)-Pd     | 98.1(3)   | O(4)-Pd-P(3)     | 87.02(17)  |
| C(1F)-Fe-C(1A)    | 108.9(4)  | P(2)-Pd-P(3)     | 97.03(9)   |
| C(1F)-Fe-C(1B)    | 110.2(4)  | S(4)-Pd-P(3)     | 170.86(10) |
| C(1A)-Fe-C(1B)    | 41.3(3)   | F(44)-P(4)-F(41) | 88.1(6)    |
| C(1F)-Fe-C(1G)    | 40.5(3)   | F(44)-P(4)-F(45) | 93.2(6)    |
| C(1A)-Fe-C(1G)    | 109.8(4)  | F(41)-P(4)-F(45) | 88.7(5)    |
| C(1B)-Fe-C(1G)    | 138.3(4)  | F(44)-P(4)-F(43) | 94.1(6)    |
| C(1F)-Fe-C(1D)    | 177.5(4)  | F(41)-P(4)-F(43) | 177.6(5)   |
| C(1A)-Fe-C(1D)    | 68.9(4)   | F(45)-P(4)-F(43) | 90.4(5)    |
| C(1B)-Fe-C(1D)    | 67.4(4)   | F(44)-P(4)-F(42) | 176.6(7)   |
| C(1G)-Fe-C(1D)    | 141.1(4)  | F(41)-P(4)-F(42) | 88.7(5)    |
| C(1F)-Fe-C(1C)    | 138.6(4)  | F(45)-P(4)-F(42) | 88.0(5)    |
| C(1A)-Fe-C(1C)    | 69.1(4)   | F(43)-P(4)-F(42) | 89.1(5)    |
| C(1B)-Fe-C(1C)    | 40.2(3)   | F(44)-P(4)-F(46) | 88.5(6)    |
| C(1G)-Fe-C(1C)    | 178.5(4)  | F(41)-P(4)-F(46) | 92.1(5)    |
| C(1D)-Fe-C(1C)    | 39.8(4)   | F(45)-P(4)-F(46) | 178.2(6)   |
| C(1F)-Fe-C(1E)    | 139.4(4)  | F(43)-P(4)-F(46) | 88.8(5)    |
| C(1A)-Fe-C(1E)    | 41.8(3)   | F(42)-P(4)-F(46) | 90.4(5)    |
| C(1B)-Fe-C(1E)    | 68.2(4)   |                  |            |

---

**Table S4b.** Full bond lengths [Å] and angles [°] for [Pt(mpo)(dppf)]PF<sub>6</sub>.

|             |            |                   |           |
|-------------|------------|-------------------|-----------|
| C(1A)-C(1B) | 1.418(7)   | F(44)-P(4)        | 1.510(6)  |
| C(1A)-C(1E) | 1.426(8)   | F(45)-P(4)        | 1.537(5)  |
| C(1A)-P(2)  | 1.794(6)   | F(46)-P(4)        | 1.560(5)  |
| C(1A)-Fe    | 2.014(6)   |                   |           |
| C(1B)-C(1C) | 1.417(9)   | C(1B)-C(1A)-C(1E) | 106.9(5)  |
| C(1B)-Fe    | 2.016(6)   | C(1B)-C(1A)-P(2)  | 123.8(5)  |
| C(1C)-C(1D) | 1.400(9)   | C(1E)-C(1A)-P(2)  | 129.2(5)  |
| C(1C)-Fe    | 2.052(7)   | C(1B)-C(1A)-Fe    | 69.5(3)   |
| C(1D)-C(1E) | 1.417(9)   | C(1E)-C(1A)-Fe    | 70.5(4)   |
| C(1D)-Fe    | 2.048(7)   | P(2)-C(1A)-Fe     | 122.0(3)  |
| C(1E)-Fe    | 2.042(6)   | C(1A)-C(1B)-C(1C) | 108.9(6)  |
| C(1F)-C(1J) | 1.431(8)   | C(1A)-C(1B)-Fe    | 69.3(4)   |
| C(1F)-C(1G) | 1.442(8)   | C(1C)-C(1B)-Fe    | 71.0(4)   |
| C(1F)-P(3)  | 1.798(6)   | C(1D)-C(1C)-C(1B) | 107.6(6)  |
| C(1F)-Fe    | 2.020(6)   | C(1D)-C(1C)-Fe    | 69.9(4)   |
| C(1G)-C(1H) | 1.413(9)   | C(1B)-C(1C)-Fe    | 68.3(4)   |
| C(1G)-Fe    | 2.030(7)   | C(1C)-C(1D)-C(1E) | 108.8(6)  |
| C(1H)-C(1I) | 1.417(9)   | C(1C)-C(1D)-Fe    | 70.2(4)   |
| C(1H)-Fe    | 2.058(7)   | C(1E)-C(1D)-Fe    | 69.5(4)   |
| C(1I)-C(1J) | 1.422(9)   | C(1A)-C(1E)-C(1D) | 107.9(6)  |
| C(1I)-Fe    | 2.079(6)   | C(1A)-C(1E)-Fe    | 68.4(3)   |
| C(1J)-Fe    | 2.039(7)   | C(1D)-C(1E)-Fe    | 70.0(4)   |
| C(2A)-C(2F) | 1.391(9)   | C(1J)-C(1F)-C(1G) | 106.9(6)  |
| C(2A)-C(2B) | 1.392(8)   | C(1J)-C(1F)-P(3)  | 125.2(5)  |
| C(2A)-P(2)  | 1.821(6)   | C(1G)-C(1F)-P(3)  | 127.9(5)  |
| C(2B)-C(2C) | 1.377(9)   | C(1J)-C(1F)-Fe    | 70.1(4)   |
| C(2C)-C(2D) | 1.366(10)  | C(1G)-C(1F)-Fe    | 69.5(4)   |
| C(2D)-C(2E) | 1.399(9)   | P(3)-C(1F)-Fe     | 123.2(3)  |
| C(2E)-C(2F) | 1.368(9)   | C(1H)-C(1G)-C(1F) | 108.3(6)  |
| C(2G)-C(2H) | 1.373(9)   | C(1H)-C(1G)-Fe    | 70.9(4)   |
| C(2G)-C(2L) | 1.394(9)   | C(1F)-C(1G)-Fe    | 68.8(4)   |
| C(2G)-P(2)  | 1.808(6)   | C(1I)-C(1H)-C(1G) | 108.2(6)  |
| C(2H)-C(2I) | 1.389(11)  | C(1I)-C(1H)-Fe    | 70.7(4)   |
| C(2I)-C(2J) | 1.365(13)  | C(1G)-C(1H)-Fe    | 68.7(4)   |
| C(2J)-C(2K) | 1.370(14)  | C(1H)-C(1I)-C(1J) | 108.4(6)  |
| C(2K)-C(2L) | 1.381(11)  | C(1H)-C(1I)-Fe    | 69.2(4)   |
| C(3A)-C(3B) | 1.377(9)   | C(1J)-C(1I)-Fe    | 68.3(4)   |
| C(3A)-C(3F) | 1.405(8)   | C(1I)-C(1J)-C(1F) | 108.1(6)  |
| C(3A)-P(3)  | 1.819(7)   | C(1I)-C(1J)-Fe    | 71.3(4)   |
| C(3B)-C(3C) | 1.369(8)   | C(1F)-C(1J)-Fe    | 68.6(3)   |
| C(3C)-C(3D) | 1.362(9)   | C(2F)-C(2A)-C(2B) | 119.0(6)  |
| C(3D)-C(3E) | 1.345(11)  | C(2F)-C(2A)-P(2)  | 120.2(5)  |
| C(3E)-C(3F) | 1.392(10)  | C(2B)-C(2A)-P(2)  | 120.4(5)  |
| C(3G)-C(3H) | 1.359(11)  | C(2C)-C(2B)-C(2A) | 119.3(7)  |
| C(3G)-C(3L) | 1.370(10)  | C(2D)-C(2C)-C(2B) | 121.9(7)  |
| C(3G)-P(3)  | 1.820(8)   | C(2C)-C(2D)-C(2E) | 118.9(7)  |
| C(3H)-C(3I) | 1.404(12)  | C(2F)-C(2E)-C(2D) | 119.8(7)  |
| C(3I)-C(3J) | 1.320(12)  | C(2E)-C(2F)-C(2A) | 121.0(7)  |
| C(3J)-C(3K) | 1.368(14)  | C(2H)-C(2G)-C(2L) | 119.2(7)  |
| C(3K)-C(3L) | 1.381(12)  | C(2H)-C(2G)-P(2)  | 121.6(6)  |
| C(4A)-N(4)  | 1.363(7)   | C(2L)-C(2G)-P(2)  | 119.3(5)  |
| C(4A)-C(4B) | 1.396(8)   | C(2G)-C(2H)-C(2I) | 120.7(9)  |
| C(4A)-S(4)  | 1.715(6)   | C(2J)-C(2I)-C(2H) | 118.9(9)  |
| C(4B)-C(4C) | 1.354(9)   | C(2I)-C(2J)-C(2K) | 121.6(9)  |
| C(4C)-C(4D) | 1.375(9)   | C(2L)-C(2K)-C(2J) | 119.3(10) |
| C(4D)-C(4E) | 1.349(9)   | C(2K)-C(2L)-C(2G) | 120.1(8)  |
| C(4E)-N(4)  | 1.355(7)   | C(3B)-C(3A)-C(3F) | 117.4(6)  |
| N(4)-O(4)   | 1.342(6)   | C(3B)-C(3A)-P(3)  | 120.1(5)  |
| O(4)-Pt     | 2.071(4)   | C(3F)-C(3A)-P(3)  | 122.4(6)  |
| P(2)-Pt     | 2.2388(15) | C(3A)-C(3B)-C(3C) | 121.6(6)  |
| P(3)-Pt     | 2.3159(17) | C(3B)-C(3C)-C(3D) | 121.1(8)  |
| S(4)-Pt     | 2.3026(17) | C(3E)-C(3D)-C(3C) | 118.5(8)  |
| F(41)-P(4)  | 1.568(6)   | C(3D)-C(3E)-C(3F) | 122.5(7)  |
| F(42)-P(4)  | 1.557(6)   | C(3E)-C(3F)-C(3A) | 118.9(8)  |
| F(43)-P(4)  | 1.545(5)   | C(3H)-C(3G)-C(3L) | 117.4(8)  |

|                   |            |                  |            |
|-------------------|------------|------------------|------------|
| C(3H)-C(3G)-P(3)  | 122.0(6)   | C(1A)-Fe-C(1I)   | 177.6(3)   |
| C(3L)-C(3G)-P(3)  | 120.3(6)   | C(1F)-Fe-C(1I)   | 68.6(3)    |
| C(3G)-C(3H)-C(3I) | 121.3(9)   | C(1B)-Fe-C(1I)   | 140.2(3)   |
| C(3J)-C(3I)-C(3H) | 119.9(10)  | C(1G)-Fe-C(1I)   | 67.8(3)    |
| C(3I)-C(3J)-C(3K) | 120.3(10)  | C(1E)-Fe-C(1I)   | 139.8(3)   |
| C(3J)-C(3K)-C(3L) | 119.6(10)  | C(1C)-Fe-C(1I)   | 113.2(3)   |
| C(3G)-C(3L)-C(3K) | 121.2(9)   | C(1J)-Fe-C(1I)   | 40.4(2)    |
| N(4)-C(4A)-C(4B)  | 116.5(6)   | C(1D)-Fe-C(1I)   | 113.2(3)   |
| N(4)-C(4A)-S(4)   | 119.7(5)   | C(1H)-Fe-C(1I)   | 40.0(2)    |
| C(4B)-C(4A)-S(4)  | 123.8(5)   | O(4)-Pt-P(2)     | 175.51(12) |
| C(4C)-C(4B)-C(4A) | 121.5(6)   | O(4)-Pt-S(4)     | 84.35(12)  |
| C(4B)-C(4C)-C(4D) | 120.0(7)   | P(2)-Pt-S(4)     | 92.42(6)   |
| C(4E)-C(4D)-C(4C) | 119.0(7)   | O(4)-Pt-P(3)     | 85.72(12)  |
| N(4)-C(4E)-C(4D)  | 121.0(7)   | P(2)-Pt-P(3)     | 97.68(6)   |
| O(4)-N(4)-C(4A)   | 121.8(5)   | S(4)-Pt-P(3)     | 169.51(6)  |
| O(4)-N(4)-C(4E)   | 116.1(5)   | F(44)-P(4)-F(45) | 93.9(4)    |
| C(4A)-N(4)-C(4E)  | 122.0(6)   | F(44)-P(4)-F(43) | 92.9(5)    |
| N(4)-O(4)-Pt      | 116.0(3)   | F(45)-P(4)-F(43) | 90.8(3)    |
| C(1A)-P(2)-C(2G)  | 107.5(3)   | F(44)-P(4)-F(42) | 176.1(5)   |
| C(1A)-P(2)-C(2A)  | 105.0(3)   | F(45)-P(4)-F(42) | 88.8(4)    |
| C(2G)-P(2)-C(2A)  | 103.9(3)   | F(43)-P(4)-F(42) | 89.8(4)    |
| C(1A)-P(2)-Pt     | 114.63(19) | F(44)-P(4)-F(41) | 90.2(5)    |
| C(2G)-P(2)-Pt     | 113.0(2)   | F(45)-P(4)-F(41) | 89.2(3)    |
| C(2A)-P(2)-Pt     | 111.9(2)   | F(43)-P(4)-F(41) | 176.9(4)   |
| C(1F)-P(3)-C(3A)  | 102.8(3)   | F(42)-P(4)-F(41) | 87.1(4)    |
| C(1F)-P(3)-C(3G)  | 102.9(3)   | F(44)-P(4)-F(46) | 88.9(4)    |
| C(3A)-P(3)-C(3G)  | 108.0(3)   | F(45)-P(4)-F(46) | 177.0(4)   |
| C(1F)-P(3)-Pt     | 123.3(2)   | F(43)-P(4)-F(46) | 88.1(3)    |
| C(3A)-P(3)-Pt     | 106.6(2)   | F(42)-P(4)-F(46) | 88.4(4)    |
| C(3G)-P(3)-Pt     | 112.2(2)   | F(41)-P(4)-F(46) | 91.8(4)    |
| C(4A)-S(4)-Pt     | 97.8(2)    |                  |            |
| C(1A)-Fe-C(1F)    | 109.3(2)   |                  |            |
| C(1A)-Fe-C(1B)    | 41.2(2)    |                  |            |
| C(1F)-Fe-C(1B)    | 110.0(3)   |                  |            |
| C(1A)-Fe-C(1G)    | 109.8(3)   |                  |            |
| C(1F)-Fe-C(1G)    | 41.7(2)    |                  |            |
| C(1B)-Fe-C(1G)    | 138.6(3)   |                  |            |
| C(1A)-Fe-C(1E)    | 41.2(2)    |                  |            |
| C(1F)-Fe-C(1E)    | 138.7(3)   |                  |            |
| C(1B)-Fe-C(1E)    | 68.5(3)    |                  |            |
| C(1G)-Fe-C(1E)    | 111.0(3)   |                  |            |
| C(1A)-Fe-C(1C)    | 69.1(3)    |                  |            |
| C(1F)-Fe-C(1C)    | 138.7(3)   |                  |            |
| C(1B)-Fe-C(1C)    | 40.8(2)    |                  |            |
| C(1G)-Fe-C(1C)    | 178.9(3)   |                  |            |
| C(1E)-Fe-C(1C)    | 68.1(3)    |                  |            |
| C(1A)-Fe-C(1J)    | 138.6(3)   |                  |            |
| C(1F)-Fe-C(1J)    | 41.3(2)    |                  |            |
| C(1B)-Fe-C(1J)    | 111.3(3)   |                  |            |
| C(1G)-Fe-C(1J)    | 69.1(3)    |                  |            |
| C(1E)-Fe-C(1J)    | 179.8(3)   |                  |            |
| C(1C)-Fe-C(1J)    | 111.9(3)   |                  |            |
| C(1A)-Fe-C(1D)    | 68.9(3)    |                  |            |
| C(1F)-Fe-C(1D)    | 177.9(3)   |                  |            |
| C(1B)-Fe-C(1D)    | 68.0(3)    |                  |            |
| C(1G)-Fe-C(1D)    | 139.6(3)   |                  |            |
| C(1E)-Fe-C(1D)    | 40.5(2)    |                  |            |
| C(1C)-Fe-C(1D)    | 39.9(3)    |                  |            |
| C(1J)-Fe-C(1D)    | 139.5(3)   |                  |            |
| C(1A)-Fe-C(1H)    | 138.5(3)   |                  |            |
| C(1F)-Fe-C(1H)    | 69.1(3)    |                  |            |
| C(1B)-Fe-C(1H)    | 179.0(3)   |                  |            |
| C(1G)-Fe-C(1H)    | 40.4(2)    |                  |            |
| C(1E)-Fe-C(1H)    | 111.8(3)   |                  |            |
| C(1C)-Fe-C(1H)    | 140.2(3)   |                  |            |
| C(1J)-Fe-C(1H)    | 68.4(3)    |                  |            |
| C(1D)-Fe-C(1H)    | 112.9(3)   |                  |            |



**Table S5a.** Anisotropic displacement parameters ( $\text{\AA}^2 \times 10^3$ ) for  $[\text{Pd}(\text{mpo})(\text{dppf})]\text{PF}_6$ . The anisotropic displacement factor exponent takes the form:  $-2\pi^2[h^2a^*2U^{11} + \dots + 2hk a^* b^* U^{12}]$ .

| Atom  | $U^{11}$ | $U^{22}$ | $U^{33}$ | $U^{23}$ | $U^{13}$ | $U^{12}$ |
|-------|----------|----------|----------|----------|----------|----------|
| C(1A) | 37(6)    | 52(7)    | 38(5)    | -2(5)    | 17(4)    | 1(5)     |
| C(1B) | 44(6)    | 44(7)    | 41(5)    | 4(5)     | 9(5)     | 2(5)     |
| C(1C) | 62(7)    | 42(7)    | 55(6)    | -5(5)    | 2(6)     | 22(5)    |
| C(1D) | 60(7)    | 35(7)    | 75(7)    | 0(6)     | 24(6)    | -5(5)    |
| C(1E) | 55(7)    | 53(7)    | 58(6)    | 6(6)     | 20(6)    | 2(6)     |
| C(1F) | 48(6)    | 37(6)    | 56(6)    | 8(5)     | 4(5)     | -1(5)    |
| C(1G) | 40(6)    | 48(7)    | 60(6)    | 0(5)     | -2(5)    | 2(5)     |
| C(1H) | 35(6)    | 46(7)    | 99(9)    | -4(6)    | -7(6)    | -2(5)    |
| C(1I) | 59(7)    | 44(7)    | 56(6)    | -11(5)   | 2(6)     | 9(6)     |
| C(1J) | 43(6)    | 29(6)    | 59(6)    | 5(5)     | 10(5)    | -3(5)    |
| C(2A) | 35(5)    | 37(6)    | 49(5)    | -1(5)    | 16(5)    | -5(4)    |
| C(2B) | 50(6)    | 56(7)    | 44(5)    | 0(6)     | 13(5)    | -1(5)    |
| C(2C) | 63(8)    | 78(9)    | 64(7)    | -13(7)   | 24(6)    | -2(7)    |
| C(2D) | 78(9)    | 55(8)    | 53(6)    | -2(6)    | 18(7)    | -17(7)   |
| C(2E) | 70(8)    | 47(8)    | 71(7)    | 7(6)     | 18(7)    | -9(6)    |
| C(2F) | 45(6)    | 43(7)    | 58(6)    | -1(5)    | 19(5)    | -10(5)   |
| C(2G) | 36(6)    | 70(8)    | 50(6)    | -23(6)   | 9(5)     | -2(5)    |
| C(2H) | 46(6)    | 50(7)    | 89(8)    | -28(6)   | 30(6)    | -2(5)    |
| C(2I) | 50(8)    | 83(11)   | 130(12)  | -56(9)   | 32(8)    | -8(7)    |
| C(2J) | 44(8)    | 94(13)   | 189(18)  | -63(12)  | 20(10)   | 5(8)     |
| C(2K) | 67(9)    | 87(11)   | 121(12)  | -32(9)   | -1(9)    | 37(8)    |
| C(2L) | 54(7)    | 62(9)    | 98(9)    | -15(7)   | 18(7)    | 12(6)    |
| C(3A) | 35(5)    | 66(7)    | 23(4)    | 0(5)     | 4(4)     | -9(5)    |
| C(3B) | 50(6)    | 51(7)    | 46(5)    | 0(5)     | 19(5)    | -3(5)    |
| C(3C) | 50(7)    | 87(9)    | 48(6)    | -7(6)    | 15(6)    | -3(6)    |
| C(3D) | 72(8)    | 77(9)    | 50(6)    | 4(6)     | 31(6)    | 0(7)     |
| C(3E) | 102(10)  | 87(10)   | 41(6)    | 1(6)     | 41(7)    | -4(8)    |
| C(3F) | 69(8)    | 73(9)    | 41(6)    | 3(6)     | 8(6)     | -1(6)    |
| C(3G) | 62(7)    | 50(8)    | 49(6)    | 13(6)    | -16(5)   | -7(6)    |
| C(3H) | 78(9)    | 57(9)    | 108(10)  | 8(8)     | -33(8)   | -17(7)   |
| C(3I) | 143(14)  | 62(11)   | 141(13)  | 34(10)   | -65(11)  | -6(10)   |
| C(3J) | 214(19)  | 42(10)   | 159(15)  | 24(10)   | -102(14) | -2(11)   |
| C(3K) | 260(20)  | 66(12)   | 240(20)  | 31(13)   | -180(20) | -41(13)  |
| C(3L) | 199(17)  | 43(9)    | 159(14)  | 42(9)    | -128(13) | -34(10)  |
| C(4A) | 36(5)    | 44(6)    | 47(5)    | -13(5)   | 7(5)     | -3(4)    |
| C(4B) | 53(7)    | 62(8)    | 43(6)    | -9(5)    | 3(5)     | -17(6)   |
| C(4C) | 55(7)    | 46(7)    | 77(8)    | 0(6)     | 13(6)    | -13(5)   |
| C(4D) | 63(7)    | 38(7)    | 87(8)    | 13(7)    | 19(7)    | -16(6)   |
| C(4E) | 45(6)    | 58(7)    | 48(6)    | 19(5)    | 16(5)    | -3(5)    |
| N(4)  | 34(5)    | 53(6)    | 38(4)    | 8(4)     | 2(4)     | 2(4)     |
| O(4)  | 45(4)    | 65(5)    | 45(4)    | -12(3)   | 8(3)     | -27(4)   |
| P(2)  | 32(1)    | 38(2)    | 53(2)    | -9(1)    | 12(1)    | -2(1)    |
| P(3)  | 45(2)    | 42(2)    | 43(1)    | 0(1)     | 1(1)     | -4(1)    |
| S(4)  | 51(2)    | 52(2)    | 45(1)    | -6(1)    | 11(1)    | -12(1)   |
| Fe    | 39(1)    | 38(1)    | 56(1)    | -5(1)    | 13(1)    | -1(1)    |
| Pd    | 38(1)    | 39(1)    | 43(1)    | -4(1)    | 7(1)     | -4(1)    |
| F(41) | 115(7)   | 171(9)   | 179(9)   | 1(7)     | 48(7)    | -66(6)   |
| F(42) | 98(7)    | 224(10)  | 107(6)   | 16(6)    | -2(5)    | 12(7)    |
| F(43) | 243(11)  | 141(8)   | 113(6)   | -30(5)   | 112(7)   | -98(8)   |
| F(44) | 123(8)   | 345(16)  | 140(9)   | 84(9)    | -13(7)   | 90(9)    |
| F(45) | 240(11)  | 107(7)   | 207(9)   | -20(6)   | 185(9)   | 13(7)    |
| F(46) | 136(8)   | 201(10)  | 148(8)   | -102(7)  | 76(7)    | -20(7)   |
| P(4)  | 50(2)    | 96(3)    | 62(2)    | -8(2)    | 18(2)    | 1(2)     |

**Table S5b.** Anisotropic displacement parameters ( $\text{\AA}^2 \times 10^3$ ) for  $[\text{Pt}(\text{mpo})(\text{dppf})]\text{PF}_6$ .

| Atom  | U <sup>11</sup> | U <sup>22</sup> | U <sup>33</sup> | U <sup>23</sup> | U <sup>13</sup> | U <sup>12</sup> |
|-------|-----------------|-----------------|-----------------|-----------------|-----------------|-----------------|
| C(1A) | 34(4)           | 42(4)           | 45(4)           | -2(3)           | 15(3)           | 2(3)            |
| C(1B) | 34(4)           | 54(5)           | 49(4)           | 0(3)            | 11(3)           | 5(3)            |
| C(1C) | 60(5)           | 42(4)           | 68(5)           | 4(4)            | 16(4)           | 15(4)           |
| C(1D) | 64(5)           | 38(4)           | 70(5)           | 1(4)            | 17(4)           | -12(4)          |
| C(1E) | 53(5)           | 55(5)           | 63(4)           | -7(4)           | 24(4)           | -9(4)           |
| C(1F) | 47(4)           | 34(4)           | 43(4)           | -4(3)           | 2(3)            | -2(3)           |
| C(1G) | 40(4)           | 48(4)           | 70(5)           | -13(4)          | 3(4)            | 1(3)            |
| C(1H) | 30(4)           | 56(5)           | 83(5)           | -16(4)          | 4(4)            | -16(4)          |
| C(1I) | 67(5)           | 46(4)           | 59(4)           | -20(4)          | 11(4)           | -4(4)           |
| C(1J) | 44(4)           | 44(4)           | 65(4)           | -4(4)           | 5(4)            | 1(3)            |
| C(2A) | 36(4)           | 42(4)           | 47(4)           | 6(3)            | 14(3)           | -4(3)           |
| C(2B) | 45(4)           | 60(5)           | 47(4)           | -13(4)          | 11(3)           | 2(4)            |
| C(2C) | 70(6)           | 73(6)           | 54(5)           | -11(4)          | 17(5)           | -8(5)           |
| C(2D) | 69(6)           | 74(6)           | 44(4)           | 1(4)            | 7(4)            | -24(5)          |
| C(2E) | 54(5)           | 57(5)           | 64(5)           | 17(4)           | 9(4)            | -11(4)          |
| C(2F) | 48(4)           | 51(4)           | 47(4)           | -2(3)           | 9(4)            | -2(4)           |
| C(2G) | 33(4)           | 44(4)           | 67(5)           | -20(4)          | 7(4)            | 7(3)            |
| C(2H) | 43(5)           | 70(6)           | 103(6)          | -35(5)          | 29(5)           | -8(4)           |
| C(2I) | 44(6)           | 85(7)           | 162(10)         | -73(7)          | 45(7)           | -19(5)          |
| C(2J) | 34(5)           | 105(9)          | 198(13)         | -79(9)          | 3(7)            | 19(6)           |
| C(2K) | 60(6)           | 80(7)           | 134(9)          | -36(6)          | -9(6)           | 31(6)           |
| C(2L) | 52(5)           | 46(5)           | 89(6)           | -18(4)          | 10(5)           | 12(4)           |
| C(3A) | 56(5)           | 49(4)           | 37(4)           | -2(3)           | 10(4)           | -14(4)          |
| C(3B) | 58(5)           | 65(5)           | 40(4)           | -5(3)           | 17(4)           | -12(4)          |
| C(3C) | 55(5)           | 72(5)           | 57(5)           | -10(4)          | 24(4)           | -5(4)           |
| C(3D) | 82(7)           | 85(6)           | 66(6)           | -10(5)          | 35(6)           | -14(5)          |
| C(3E) | 85(7)           | 108(7)          | 51(5)           | 8(5)            | 28(5)           | -14(6)          |
| C(3F) | 71(6)           | 97(7)           | 43(4)           | 15(4)           | -1(4)           | -4(5)           |
| C(3G) | 75(6)           | 36(4)           | 74(5)           | 1(4)            | -20(5)          | -3(4)           |
| C(3H) | 106(8)          | 57(5)           | 99(7)           | 7(5)            | -40(6)          | -4(6)           |
| C(3I) | 124(10)         | 76(8)           | 155(10)         | 17(7)           | -86(8)          | -7(7)           |
| C(3J) | 208(15)         | 50(7)           | 182(12)         | 19(7)           | -128(10)        | 11(8)           |
| C(3K) | 255(18)         | 41(6)           | 194(13)         | 17(7)           | -142(12)        | -17(8)          |
| C(3L) | 165(11)         | 49(6)           | 112(7)          | 6(5)            | -91(7)          | -5(6)           |
| C(4A) | 38(4)           | 38(4)           | 46(4)           | -5(3)           | 7(3)            | 9(3)            |
| C(4B) | 52(5)           | 51(5)           | 59(4)           | -7(4)           | 10(4)           | -12(4)          |
| C(4C) | 52(5)           | 55(5)           | 81(6)           | -9(4)           | 0(4)            | -21(4)          |
| C(4D) | 62(5)           | 49(5)           | 81(6)           | 14(4)           | 19(5)           | -9(4)           |
| C(4E) | 53(5)           | 47(4)           | 61(5)           | 11(4)           | 19(4)           | -3(4)           |
| N(4)  | 36(3)           | 31(3)           | 50(3)           | -2(3)           | 4(3)            | -3(2)           |
| O(4)  | 52(3)           | 52(3)           | 43(3)           | -4(2)           | 5(2)            | -21(2)          |
| P(2)  | 27(1)           | 38(1)           | 50(1)           | -6(1)           | 10(1)           | -2(1)           |
| P(3)  | 44(1)           | 38(1)           | 46(1)           | -2(1)           | -4(1)           | -2(1)           |
| S(4)  | 46(1)           | 46(1)           | 46(1)           | -6(1)           | 11(1)           | -10(1)          |
| Fe    | 36(1)           | 37(1)           | 62(1)           | -7(1)           | 12(1)           | -1(1)           |
| Pt    | 33(1)           | 37(1)           | 43(1)           | -3(1)           | 4(1)            | -3(1)           |
| F(41) | 90(5)           | 153(6)          | 186(6)          | 13(5)           | 37(5)           | -35(4)          |
| F(42) | 93(5)           | 216(7)          | 112(4)          | 29(5)           | 5(4)            | 14(5)           |
| F(43) | 233(8)          | 143(5)          | 133(5)          | -34(4)          | 116(6)          | -99(5)          |
| F(44) | 123(6)          | 314(10)         | 142(6)          | 83(7)           | -11(5)          | 89(7)           |
| F(45) | 228(8)          | 114(5)          | 177(6)          | -12(4)          | 158(6)          | 17(5)           |
| F(46) | 108(5)          | 209(7)          | 129(5)          | -91(5)          | 41(4)           | -16(5)          |
| P(4)  | 48(1)           | 91(2)           | 62(1)           | -4(1)           | 18(1)           | 3(1)            |

**Table S6a.** Hydrogen coordinates ( $\times 10^4$ ) and isotropic displacement parameters ( $\text{\AA}^2 \times 10^3$ ) for  $[\text{Pd}(\text{mpo})(\text{dppf})]\text{PF}_6$ .

| Aom   | x     | y    | z     | U(eq) |
|-------|-------|------|-------|-------|
| H(1B) | 3409  | 7324 | 1647  | 52    |
| H(1C) | 4046  | 8395 | 1875  | 67    |
| H(1D) | 6235  | 8540 | 1576  | 67    |
| H(1E) | 6955  | 7579 | 1121  | 65    |
| H(1G) | 7842  | 6696 | 2939  | 63    |
| H(1H) | 8600  | 7757 | 3259  | 78    |
| H(1I) | 6823  | 8295 | 3692  | 67    |
| H(1J) | 5024  | 7555 | 3731  | 54    |
| H(2B) | 5704  | 5637 | -57   | 60    |
| H(2C) | 4693  | 5471 | -1435 | 80    |
| H(2D) | 2907  | 6068 | -2100 | 75    |
| H(2E) | 2219  | 6839 | -1465 | 75    |
| H(2F) | 3145  | 6995 | -95   | 57    |
| H(2H) | 7528  | 6708 | 588   | 71    |
| H(2I) | 9750  | 6457 | 963   | 104   |
| H(2J) | 10525 | 5752 | 1950  | 134   |
| H(2K) | 9077  | 5236 | 2499  | 117   |
| H(2L) | 6804  | 5508 | 2124  | 86    |
| H(3B) | 2388  | 6650 | 2438  | 57    |
| H(3C) | 636   | 6969 | 2925  | 74    |
| H(3D) | 853   | 6949 | 4271  | 76    |
| H(3E) | 2828  | 6655 | 5145  | 87    |
| H(3F) | 4628  | 6368 | 4697  | 75    |
| H(3H) | 7440  | 6267 | 4470  | 112   |
| H(3I) | 8715  | 5550 | 5287  | 164   |
| H(3J) | 8255  | 4575 | 5076  | 204   |
| H(3K) | 6460  | 4281 | 3998  | 289   |
| H(3L) | 5078  | 4997 | 3238  | 203   |
| H(4B) | 908   | 4466 | 104   | 66    |
| H(4C) | -235  | 3838 | 708   | 73    |
| H(4D) | 270   | 3823 | 2104  | 76    |
| H(4E) | 1762  | 4512 | 2822  | 60    |

**Table S6b.** Hydrogen coordinates ( $\times 10^4$ ) and isotropic displacement parameters ( $\text{\AA}^2 \times 10^3$ ) for  $[\text{Pt}(\text{mpo})(\text{dppf})]\text{PF}_6$ .

| Atom  | x     | y    | z     | U(eq) |
|-------|-------|------|-------|-------|
| H(1B) | 3393  | 7321 | 1623  | 55    |
| H(1C) | 4019  | 8402 | 1863  | 68    |
| H(1D) | 6227  | 8552 | 1583  | 69    |
| H(1E) | 6954  | 7577 | 1130  | 66    |
| H(1G) | 7842  | 6716 | 2903  | 66    |
| H(1H) | 8542  | 7779 | 3223  | 70    |
| H(1I) | 6783  | 8285 | 3730  | 70    |
| H(1J) | 4922  | 7550 | 3667  | 64    |
| H(2B) | 5652  | 5604 | -62   | 62    |
| H(2C) | 4652  | 5458 | -1405 | 79    |
| H(2D) | 2919  | 6052 | -2103 | 77    |
| H(2E) | 2198  | 6842 | -1445 | 71    |
| H(2F) | 3186  | 6996 | -106  | 59    |
| H(2H) | 7461  | 6737 | 563   | 84    |
| H(2I) | 9723  | 6486 | 905   | 112   |
| H(2J) | 10531 | 5780 | 1874  | 142   |
| H(2K) | 9119  | 5277 | 2457  | 118   |
| H(2L) | 6869  | 5539 | 2137  | 77    |
| H(3B) | 2373  | 6682 | 2447  | 64    |
| H(3C) | 644   | 6956 | 2944  | 72    |
| H(3D) | 875   | 6928 | 4295  | 90    |
| H(3E) | 2845  | 6612 | 5137  | 96    |
| H(3F) | 4623  | 6309 | 4671  | 88    |
| H(3H) | 7310  | 6279 | 4472  | 121   |
| H(3I) | 8712  | 5571 | 5269  | 172   |
| H(3J) | 8315  | 4591 | 5026  | 220   |
| H(3K) | 6694  | 4287 | 3899  | 246   |
| H(3L) | 5276  | 4983 | 3117  | 162   |
| H(4B) | 862   | 4479 | 103   | 66    |
| H(4C) | -192  | 3829 | 732   | 80    |
| H(4D) | 282   | 3843 | 2112  | 77    |
| H(4E) | 1772  | 4526 | 2826  | 64    |



**Table S7.** <sup>13</sup>C NMR chemical shift values (δ, in ppm) of the ligand and the complexes in DMSO-*d*<sub>6</sub>.

| Ligand       | Carbon   | Free Ligand | [Pd(mpo)(dppf)](PF <sub>6</sub> )                                                                                 | Δδ <sup>a</sup> | [Pt(mpo)(dppf)](PF <sub>6</sub> )                                                                             | Δδ <sup>a</sup> |
|--------------|----------|-------------|-------------------------------------------------------------------------------------------------------------------|-----------------|---------------------------------------------------------------------------------------------------------------|-----------------|
| mpo          | <b>1</b> | 167.91      | 154.9                                                                                                             | -13.01          | 151.8                                                                                                         | -16.11          |
|              | <b>2</b> | 132.32      | 127.5                                                                                                             | -4.82           | 128.2                                                                                                         | -4.12           |
|              | <b>3</b> | 124.02      | 132.1                                                                                                             | 8.08            | 132.1                                                                                                         | 8.08            |
|              | <b>4</b> | 114.66      | 120.1                                                                                                             | 5.44            | 120.7                                                                                                         | 6.04            |
|              | <b>5</b> | 139.04      | 138.1                                                                                                             | -0.94           | 139.1                                                                                                         | 0.06            |
| dppf<br>(Cp) | -        | -           | C-H <sub>a</sub> 78.01<br>C-H <sub>b</sub> 75.85<br>C-H <sub>c</sub> 74.48<br>C-H <sub>d</sub> 74.48<br>C-P 78.13 | -               | C-H <sub>a</sub> 76.89<br>C-H <sub>b</sub> 75.85<br>C-H <sub>c</sub> 75.39<br>C-H <sub>d</sub> 75.02<br>C-P * | -               |

<sup>a</sup> Δδ= (δ<sub>complex</sub> - δ<sub>ligand</sub>)

\* not assigned
